# Supplementary material
Source: Research Square preprint supplement (doi:10.21203/rs.3.rs-8555871/v1)
Supplement: Supplementary file 1 [file 9b5621e00d83f9d2b25617d2.xlsx]

## Sheet: ratio
Supplementary Table 2A: the ratio of immune subsets before and after HFRT
patient No.	preTtoLym	preCD4TtoLym	preCD8TtoLym	preCD4toCD8	preCD4posCD8postoT	preCD4negCD8negtoT	preTregtoCD4posT	prerTregtoCD4posT	premTregtoCD4posT	preTexhtoT	aftTexhtoT	preCD8posTexhtoT	aftCD8posTexhtoT	preCD4posTexhtoT	aftCD4posTexhtoT	prePD1postoT	preCD8posPD1postoT	preCD4posPD1postoT	preTIM3postoT	preCD8posTim3postoT	preCD4posTim3postoT	preNaiveCD8postoT	preCD8TcmtoT	preCD8TemtoT	preTEMRAtoT	preCD8TefftoT	preNaiveCD4postoT	preCD4TcmtoT	preCD4TemtoT	preCD4TefftoT	preNaiveCD8toCD8Tcm	preNaiveCD8toCD8Tem	preCD8TcmtoCD8Tem	preNaiveCD4toCD4Tcm	preNaiveCD4toCD4Tem	preCD4TcmtoCD4Tem	preNKtoLym	preCD56dimCD16postoNK	preCD56hiCD16negtoNK	preNKTtoLym	preLymtoALL	preGrantoALL	preEOtoALL	preBActoALL	prepDCtoALL	prePCtoALL	preMotoALL	preCD14posCD16negtoMo	preCD14posCD16dimtoMo
1	81	32.38	43.4	0.75	2.45	3.99	5.47	0.48	4.99	0.43	0.74	0.24	0.7	0.12	0.01	0.43	0.24	0.12	99.86	53.51	39.9	8.27	1.54	22.38	19.81		9.67	13.5	13.24		5.38	0.37	0.07	0.72	0.73	1.02	18.61	92.99	1.67	8.72	5.59	89.1	0.01	0.06	0.01	0	1.78	64.45	35.67
2	95.39	33.8	51.34	0.66	2.98	7.76	3.48	1.94	1.54	0.72	0.06	0.5	0.06	0.04	0	9.99	4.07	5.17	9.42	6.73	0.86	9.62	2.31	18.15	22.88	26.67	26.67	7.02	10.61	5.93	4.16	0.53	0.13	1.69	1.12	0.66	4.49	90.36	0.52	11.46	24.12	68.43	0.04	0.11	0.01	0.01	0.35	21.41	67.09
3	68.91	25.55	36.04	0.71	2.66	7.97	6.97	1.19	5.78	0.79	1.6	0.79	1.58	0	0	10.55	6.75	3.24	4.33	4.29	0	2.13	1.2	13.68	7.47	35.77	8.3	11.54	14.03	3.22	1.78	0.16	0.09	0.72	0.59	0.82	28.83	97.94	2.02	6.72	9.62	64.78	4.15	0.56	0.06	0	12.99	88.97	9.59
4	70.96	55.88	13.83	4.04	0.68	1.08	8.93	2.93	5.99	0.65	0.46	0.5	0.39	0.08	0.08	20.39	7.18	12.91	0.73	0.5	0.1	3.59	1.76	7.11	4.55	7.58	29.81	34.63	13.76	0.55	2.04	0.51	0.25	0.86	2.17	2.52	28.8	97.52	2.48	1.87	6.18	76.39	0.24	0.76	0.06	0	11.24	86.38	13.32
5	75.02	29.8	32.81	0.91	0.79	15.75	5.29	1.93	3.36	4.92	0.29	4.69	0.14	0.06	0.1	21.37	14.08	6.66	12.28	11.63	0.35	7.04	2.19	12.75	19.01	21.08	9.28	24.61	5.73	0.1	3.22	0.55	0.17	0.38	1.62	4.29	23.71	83.39	0.98	14.51	11.06	77.47	0.02	0.24	0	0	6.15	51.11	45.14
7	95.11	22.7	61.58	0.37	1.42	9.97	2.2	0	0.29	0	0.03	0	0.01	0	0.01	12.62	10.82	1.42	0.03	0.02	0.01	2.47	0.14	2.8	38.64	60.88	2.58	8.12	11.81	1.35	17.84	0.88	0.05	0.32	0.22	0.69	3.43	90.29	9.98	2.41	45.86	37.36	1.34	0.41	0.24	0	11.16	91.05	3.03
9	82.32	59.78	19.68	3.04	0.14	3.33	7.19	1.85	5.25	1.55	8.91	0.45	7.5	0.91	0.9	14.96	5.49	8.36	16.56	2.48	13.53	10.41	1.43	6.66	3.86	5.8	5.8	33.68	8.84	0.05	7.3	1.56	0.21	0.89	3.4	3.81	17.06	77.2	1.16	1.71	7.78	73.94	3.64	0.25	0.01	0	10.28	83.77	15.49
[truncated: 45 more columns]

## Sheet: absolute number
Supplementary Table 2B: the absolute number of immune subsets before and after HFRT (×10e9/L)
patient No.	preTtoLym	preCD4TtoLym	preCD8TtoLym	preCD4toCD8	preCD4posCD8postoT	preCD4negCD8negtoT	preTregtoCD4posT	prerTregtoCD4posT	premTregtoCD4posT	preTexhtoT	aftTexhtoT	preCD8posTexhtoT	aftCD8posTexhtoT	preCD4posTexhtoT	aftCD4posTexhtoT	prePD1postoT	preCD8posPD1postoT	preCD4posPD1postoT	preTIM3postoT	preCD8posTim3postoT	preCD4posTim3postoT	preNaiveCD8postoT	preCD8TcmtoT	preCD8TemtoT	preTEMRAtoT	preCD8TefftoT	preNaiveCD4postoT	preCD4TcmtoT	preCD4TemtoT	preCD4TefftoT	preNaiveCD8toCD8Tcm	preNaiveCD8toCD8Tem	preCD8TcmtoCD8Tem	preNaiveCD4toCD4Tcm	preNaiveCD4toCD4Tem	preCD4TcmtoCD4Tem	preNKtoLym	preCD56dimCD16postoNK	preCD56hiCD16negtoNK	preNKTtoLym	preLymtoALL	preGrantoALL	preEOtoALL	preBActoALL	prepDCtoALL	prePCtoALL	preMotoALL	preCD14posCD16negtoMo	preCD14posCD16dimtoMo
1	0.2866	0.1146	0.1536	0.7461	0.007	0.0114	0.0063	0.0078	0.0005	0.0036	0.0057	0.0043	0.0012	0.0074	0.0007	0.007	0.0003	0.0001	0.0012	0.0238	0.0007	0.009	0.0003	0.0138	0.2862	0.1534	0.1144	0.0237	0.0044	0.0641	0.06		0.03	0.04	0.04		5.37	0.37	0.07	0.72	0.73	1.02	0.0659	0.0903	0.0612	0.066	0	0.03	0.35
2	0.9341	0.331	0.5028	0.6584	0.0278	0.0725	0.0115	0.0094	0.0064	0.0055	0.0051	0.0039	0.0067	0.0003	0.0047	0.0003	0.0004	0	0.0933	0.0088	0.038	0.0025	0.0483	0.0054	0.088	0.0629	0.008	0.0899	0.0216	0.1695	0.21	0.25	0.25	0.07	0.1	0.06	4.16	0.53	0.13	3.8	2.51	0.66	0.044	0.024	0.0397	0.021	0	0.11	0.98
3	0.4024	0.1492	0.2104	0.7089	0.0107	0.0321	0.0104	0.0236	0.0018	0.0036	0.0086	0.02	0.0032	0.0049	0.0032	0.0048	0	0	0.0425	0.0422	0.0272	0.0181	0.013	0.021	0.0174	0.0173	0	0.0086	0.0048	0.055	0.03	0.14	0.03	0.05	0.06	0.01	1.78	0.16	0.09	0.72	0.59	0.82	0.1683	0.1091	0.1649	0.1051	0	0.04	0.58
4	0.1355	0.1067	0.0264	4.0405	0.0009	0.0015	0.0095	0.0102	0.0031	0.0015	0.0064	0.0087	0.0009	0.0011	0.0007	0.0009	0.0001	0.0002	0.0276	0.0748	0.0097	0.0289	0.0175	0.0442	0.001	0.0007	0.0001	0.0049	0.0024	0.0096	0.01	0.01	0.04	0.05	0.02	0	2.04	0.5	0.25	0.86	2.17	2.52	0.055	0.2823	0.0536	0.2661	0	0	0.19
5	0.5285	0.2099	0.2312	0.9083	0.0042	0.0832	0.0111	0.0007	0.0041	0.0004	0.0071	0.0003	0.026	0.0035	0.0248	0.0017	0.0003	0.0012	0.1129	0.0119	0.0744	0.0056	0.0352	0.0034	0.0649	0.0615	0.0018	0.0372	0.0116	0.0674	0.1	0.11	0.05	0.13	0.03	0	3.21	0.55	0.17	0.38	1.62	4.29	0.167	0.0156	0.1393	0.0059	0	0.1	0.7
7	1.8407	0.4393	1.1918	0.3686	0.0261	0.1835	0.0097	0.0137	0	0.0031	0.0013	0.0107	0	0.0002	0	0.0001	0	0.0001	0.2323	0.0285	0.1992	0.0081	0.0261	0.0181	0.0006	0.0004	0.0002	0.0455	0.0026	0.0515	0.71	1.12	0.05	0.15	0.22	0.02	17.64	0.88	0.05	0.32	0.22	0.69	0.0664	0.0295	0.0599	0.028	0.01	0.05	1.94
9	0.5117	0.3716	0.1223	3.0376	0.0007	0.017	0.0267	0.024	0.0069	0.0066	0.0195	0.0173	0.0079	0.0643	0.0023	0.0542	0.0047	0.0065	0.0766	0.2372	0.0281	0.0789	0.0428	0.1324	0.0847	0.0127	0.0692	0.0533	0.0073	0.0341	0.02	0.03	0.03	0.17	0.05	0	7.28	1.56	0.21	0.17	0.66	3.81	0.106	0.6909	0.0819	0.6391	0	0.01	0.62
[truncated: 45 more columns]
