# Supplementary material
Source: Research Square preprint supplement (doi:10.21203/rs.3.rs-8555871/v1)
Supplement: Supplementary file 1 [file bd822b6eb070b0af04dd30ef.docx]

| No. | follow-up (mo) | Age | Sex | Diagnosis | HD-MTX | Prior lines of therapy | Prior ASCT | Primary refractory | CNS disease status at RT | CNS site involved | site out of CNS | RT-field | Baseline major target lesion size(cm) | Target lesion size after RT(cm) | Concurrent systemic therapy with RT | CAR-T product | ICANS | CRS | Status at last follow up |
| --- | --- | --- | --- | --- | --- | --- | --- | --- | --- | --- | --- | --- | --- | --- | --- | --- | --- | --- | --- |
| 1 | 34 | 58 | F | DLBCL | Yes | 5 | No | No | PD | Parenchyma |  | WBRT | 3 | 1 | Orelabrutinib | Relma-cel | 0 | 0 | CR |
| 2 | 20 | 55 | M | DLBCL | Yes | 3 | No | No | PD | Parenchyma | gastric | WBRT | 1.5 | 0.74 |  | Relma-cel | 0 | 1 | CR |
| 3 | 10 | 76 | M | DLBCL | Yes | 1 | No | Yes | PD | Parenchyma |  | WBRT | NA | NA | Zanubrutinib | Relma-cel | 0 | 0 | CR |
| 4 | 9 | 64 | M | DLBCL | Yes | 2 | No | Yes | PD | leptomeninges | lung | WBRT | NA | NA |  | Axi-cel | 1 | 3 | D |
| 5 | 18 | 48 | M | DLBCL | Yes | 2 | Yes | No | PD | Parenchyma+  leptomeninges |  | WBRT | 2.5 | 0.75 | Orelabrutinib | Relma-cel | 0 | 0 | CR |
| 6 | 17 | 49 | M | PCNSL | Yes | 2 | No | No | PD | Parenchyma |  | WBRT | 1 | 0.5 | Temozolomide | Axi-cel | 3 | 1 | CR |
| 7 | 12 | 45 | M | PCNSL | Yes | 3 | No | Yes | PD | Parenchyma+  leptomeninges+orbits |  | WBRT+orbits | 0.6 | 0.5 |  | Axi-cel | 1 | 1 | CR |
| 8 | 4 | 61 | M | PCNSL | Yes | 3 | No | Yes | PD | Parenchyma+  leptomeninges |  | WBRT | 1.5 | 0.5 |  | Axi-cel | 0 | 1 | CR |
| 9 | 22 | 40 | M | PCNSL | Yes | 2 | No | No | PD | Parenchyma |  | WBRT | 3.5 | 2.3 |  | Relma-cel | 0 | 1 | PD |

Supplementary Table 1. patient characteristics
